# Supplementary material for: ABO Blood Groups, RhD Factor and Their Association with Subclinical Atherosclerosis Assessed by Carotid Ultrasonography
Source: MDPI journal article supplement (doi:10.3390/jcm13051333), 2024-02-27
Supplement: s1 [file s1]

Table S1: Baseline Characteristics stratified for blood groups and presented separately for men and women.

|                          | O                      | Non-O                  | P-value <sup>1</sup> | RhD+                   | RhD-                   | P-value <sup>1</sup> |
|--------------------------|------------------------|------------------------|----------------------|------------------------|------------------------|----------------------|
| <b>Men</b>               |                        |                        |                      |                        |                        |                      |
| N                        | 469                    | 778                    |                      | 1056                   | 191                    |                      |
| Age [years]              | 59.9 (50.0;60.0)       | 59.9 (50.06;60.03)     | 0.21                 | 59.9 (50.1;60.0)       | 59.9 (50.0;60.0)       | 0.66                 |
| BMI [kg/m <sup>2</sup> ] | 27.5 (25.3;30.7)       | 27.5 (25.2;30.6)       | 0.81                 | 27.4 (25.2;30.5)       | 28.1 (25.4;31.4)       | 0.11                 |
| Waist [cm]               | 100.5<br>(94.0;109.0)  | 100.0<br>(94.0;108.0)  | 0.99                 | 100.0<br>(94.0;108.0)  | 101.0<br>(94.0;110.0)  | 0.23                 |
| SBP [mmHg]               | 130.0<br>(120.0;140.0) | 130.0<br>(121.0;140.0) | 0.82                 | 130.0<br>(120.0;140.0) | 132.0<br>(120.0;140.0) | 0.79                 |
| Hypertension (%)         | 58.8                   | 58.5                   | 0.97                 | 58.3                   | 60.2                   | 0.68                 |
| Diabetes (%)             | 10.1                   | 8.3                    | 0.31                 | 8.9                    | 9.4                    | 0.92                 |
| Smoking (%)              | 12.0                   | 13.2                   | 0.58                 | 12.6                   | 12.7                   | 1.00                 |
| Snus (%)                 | 25.4                   | 28.1                   | 0.34                 | 26.6                   | 29.6                   | 0.45                 |
| Using statin (%)         | 16.1                   | 17.3                   | 0.67                 | 16.5                   | 18.5                   | 0.6                  |
| CIMT [mm]                | 0.75 (0.65;0.88)       | 0.74 (0.65;0.87)       | 0.92                 | 0.74 (0.65;0.87)       | 0.75 (0.65;0.89)       | 0.88                 |
| Plaque absence (%)       | 49.9                   | 46.1                   | 0.22                 | 47.0                   | 50.8                   | 0.37                 |
| Plaque unilateral (%)    | 26.7                   | 25.8                   | 0.79                 | 26.8                   | 22.5                   | 0.2                  |
| Plaque bilateral (%)     | 23.5                   | 28.0                   | 0.09                 | 26.2                   | 26.7                   | 0.8                  |
| <b>Women</b>             |                        |                        |                      |                        |                        |                      |
| N                        | 633                    | 1049                   |                      | 1445                   | 237                    |                      |
| Age [years]              | 59.9 (50.0;60.0)       | 59.9 (50.0;60.0)       | 0.84                 | 59.9 (50.0;60.0)       | 59.9 (50.1;60.0)       | 0.52                 |
| BMI [kg/m <sup>2</sup> ] | 26.5 (23.6;30.4)       | 26.7 (23.7;30.5)       | 0.33                 | 26.6 (23.7;30.5)       | 26.7 (23.1;29.8)       | 0.29                 |
| Waist [cm]               | 91.0<br>(82.0;100.0)   | 92.0<br>(83.0;101.0)   | 0.37                 | 91.0<br>(83.0;101.0)   | 92.0<br>(83.0;100.0)   | 0.65                 |
| SBP [mmHg]               | 125.0<br>(115.0;135.0) | 127.0<br>(115.0;138.0) | 0.07                 | 126.0<br>(115.0;136.0) | 124.0<br>(115.0;136.0) | 0.42                 |
| Hypertension (%)         | 44.2                   | 47.7                   | 0.18                 | 45.49                  | 51.48                  | 0.10                 |
| Diabetes (%)             | 4.9                    | 6.6                    | 0.18                 | 5.8                    | 6.9                    | 0.60                 |
| Smoking (%)              | 12.3                   | 13.3                   | 0.62                 | 12.2                   | 17.3                   | <b>0.04*</b>         |
| Snus (%)                 | 9.8                    | 10.5                   | 0.74                 | 9.9                    | 12.1                   | 0.38                 |
| Using statin (%)         | 8.7                    | 8.8                    | 1.00                 | 8.9                    | 7.6                    | 0.58                 |
| CIMT [mm]                | 0.68 (0.62; 0.78)      | 0.68 (0.61; 0.78)      | 0.81                 | 0.68 (0.61; 0.78)      | 0.67 (0.61; 0.77)      | 0.25                 |
| Plaque absence (%)       | 60.0                   | 63.6                   | 0.16                 | 61.9                   | 64.6                   | 0.47                 |
| Plaque unilateral (%)    | 24.2                   | 21.8                   | 0.22                 | 22.9                   | 21.5                   | 0.60                 |
| Plaque bilateral (%)     | 15.6                   | 14.6                   | 0.43                 | 15.2                   | 13.9                   | 0.60                 |

Continuous variables presented as medians (25<sup>th</sup> to 75<sup>th</sup> percentiles) and categorical variables as percent1. Calculated with Mann-Whitney U test for continuous variables and Chi<sup>2</sup>-test for categorical. P-value < 0.05 in bold.

Table S2: Drop-out analysis comparing excluded and included participants.

|                                                                                                                                      | Included            | Excluded             | P-value <sup>1</sup> |
|--------------------------------------------------------------------------------------------------------------------------------------|---------------------|----------------------|----------------------|
| N                                                                                                                                    | 2929                | 603                  |                      |
| Male N (%)                                                                                                                           | 1247 (42.6)         | 415 (68.8)           | <b>&lt;0.001</b>     |
| Age [years]                                                                                                                          | 59.9 (50.0;60.0)    | 59.9 (50.0;60.03)    | 0.92                 |
| BMI [kg/m <sup>2</sup> ]                                                                                                             | 27.1 (24.3;30.5)    | 26.84 (24.3;30.1)    | 0.36                 |
| Waist [cm]                                                                                                                           | 96.0 (87.0;105.0)   | 97.0 (88.8;105.0)    | 0.17                 |
| SBP [mmHg]                                                                                                                           | 128.0 (118.0;139.0) | 130.00 (120.0;140.0) | <b>&lt;0.001</b>     |
| Hypertension (%)                                                                                                                     | 51.5                | 53.1                 | 0.53                 |
| Diabetes (%)                                                                                                                         | 7.1                 | 5.8                  | 0.27                 |
| Smoking (%)                                                                                                                          | 12.8                | 11.8                 | 0.53                 |
| Snus (%)                                                                                                                             | 17.1                | 21.9                 | <b>0.006</b>         |
| Using statin (%)                                                                                                                     | 11.7                | 7.6                  | <b>0.004</b>         |
| CIMT [mm]                                                                                                                            | 0.71 (0.63;0.82)    | 0.72 (0.63;0.82)     | 0.30                 |
| Plaque absence (%)                                                                                                                   | 56.0                | 51.9                 | 0.07                 |
| Plaque on one side (%)                                                                                                               | 24.2                | 24.0                 | 0.57                 |
| Plaque on two sides (%)                                                                                                              | 19.8                | 24.0                 | <b>0.02</b>          |
| Continuous variables presented as medians (25 <sup>th</sup> to 75 <sup>th</sup> percentiles) and non-continuous variables as percent |                     |                      |                      |
| 1. Calculated with Mann-Whitney U test for continuous variables and Chi <sup>2</sup> -test for categorical. P-value < 0.05 in bold.  |                     |                      |                      |

Table S3 the impact of RhD on CIMT [B (CI95%)] assessed in non-O and O blood group separately

| CIMT                    | O    |                          | Non-O |                          |
|-------------------------|------|--------------------------|-------|--------------------------|
|                         | RhD+ | RhD-                     | RhD+  | RhD-                     |
| All age groups (N)      | 948  | 154                      | 1553  | 274                      |
| B (CI 95%)              | ref  | 0.99 (0.95; 1.02)        | ref   | 1.00 (0.97; 1.02)        |
| B (CI 95%) <sup>1</sup> | ref  | 0.99 (0.96; 1.02)        | ref   | 0.92 (0.97;1.01)         |
| 40-year-old (N)         | 80   | 13                       | 105   | 21                       |
| B (CI 95%)              | ref  | 1.08 (1.00; 1.17))       | ref   | <b>1.09 (1.01; 1.17)</b> |
| B (CI 95%) <sup>2</sup> | ref  | <b>1.04 (1.01; 1.17)</b> | ref   | <b>1.08 (1.01; 1.15)</b> |
| 50-year-old (N)         | 256  | 46                       | 451   | 69                       |
| B (CI 95%)              | ref  | 0.96 (0.67;1.43)         | ref   | 1.00 (0.95; 1.04)        |
| B (CI 95%) <sup>2</sup> | ref  | 0.96 (0.91; 1.01)        | ref   | 1.00 (0.96; 1.04)        |
| 60-year-old (N)         | 612  | 95                       | 997   | 184                      |
| B (CI 95%)              | ref  | 0.99 (0.95; 1.04)        | ref   | 0.98 (0.95; 1.01)        |
| B (CI 95%) <sup>2</sup> | ref  | 0.99 (0.95; 1.03)        | ref   | 0.98 (0.95; 1.01)        |

1. Adjusted for sex and age . 2. Adjusted for sex.

B = unstandardized B. B is interpreted as the ratio of geometric mean of CIMT compared to the reference.

Thus, B > 1 implies that mean CIMT was higher among RhD- compared to RhD+

Table S4. Comparison of ABO blood group (Non-O vs O) and RhD (RhD- vs RhD+) and their association with CIMT [B (CI95%)]. In 50- and 60-year-old participants that reported heredity for CVD when aged 40 years.

| CIMT                                                                                                                                                                                                                                                        | O   | Non-O             | RhD+ | RhD-              |
|-------------------------------------------------------------------------------------------------------------------------------------------------------------------------------------------------------------------------------------------------------------|-----|-------------------|------|-------------------|
| 50-year-old (N)                                                                                                                                                                                                                                             | 63  | 90                | 133  | 20                |
| B (CI 95%)                                                                                                                                                                                                                                                  | ref | 0.99 (0.94; 1.05) | ref  | 0.97 (0.90; 1.06) |
| B (CI 95%) <sup>1</sup>                                                                                                                                                                                                                                     | ref | 1.00 (0.94; 1.05) | ref  | 0.97 (0.89;1.05)  |
| 60-year-old (N)                                                                                                                                                                                                                                             | 89  | 163               | 220  | 32                |
| B (CI 95%)                                                                                                                                                                                                                                                  | ref | 1.01 (0.96; 1.06) | ref  | 1.01 (0.94; 1.09) |
| B (CI 95%) <sup>1</sup>                                                                                                                                                                                                                                     | ref | 1.01 (0.97; 1.07) | ref  | 1.01 (0.94; 1.08) |
| <p>1. Adjusted for sex</p> <p>B = Unstandardized B. B is interpreted as the ratio of geometric mean of CIMT compared to the reference.</p> <p>Thus, B &gt; 1 implies that mean CIMT was higher among Non-O or RhD- compared to O or RhD+, respectively.</p> |     |                   |      |                   |
